# Supplementary material for: Mindset Over Molecule: Comparing Self-Transcendent and Mystical Experiences Across Recreational Psilocybin, MDMA, and Cannabis Use
Source: Research Square preprint supplement (doi:10.21203/rs.3.rs-7266162/v1), 2025-09-12
Supplement: Supplementary file 1 [file bfc0085ea533616477ac07dd.docx]

**Supplementary Online Materials**

**Appendix A: Hallucinogen Rating Scale—Intensity Measure Details**

The HRS is a self-report scale that assesses six dimensions of the psychedelic experience: Somaesthesia, Affect, Perception, Cognition, Volition, and Intensity. In the current study, items were from the Intensity subscale of the Hallucinogen Rating Scale assessed (Riba et al., 2001; Strassman et al., 1994). The first item assessed time between administration and perceived effects on a scale ranging, with the following options: 0-5 minutes, 5-15 minutes, 15-30 minutes, 30-60 minutes, and more than one hour. The remaining items (2 through 4) assessed waxing and waning of the experience, subjective intensity, and the subjective "high" on a 5-point Likert scale ranging from 0 (Not at all) to 4 (Extremely). Consistent with past work (Riba et al., 2001), internal consistency of these items was poor (α = .39). The item assessing time between administration and perceived effect showed no association with the other variables (spearman’s rhos (ρs) < .05, *p*s > .33). The waxing and waning items had small, statistically significant associations with the other items (ρs .17 - .25, *p*s < .001). The items assessing subjective intensity and high had a decent intercorrelation (ρ = .64, *p* < .001), and were thus combined into a composite ‘intensity’ subscale. An exploratory factor analysis further confirmed that items 1 and 2 had low factor loadings, while items 3 and 4 grouped together. Therefore, we combined items 3 and 4 into a composite “intensity” item and excluded items 1 and 2.

**Appendix B:** Table of Differences between Conditions on Covariate Measures

|  | **Means (SD)** | | |  | **Cohen’s D (p-values)** | | |
| --- | --- | --- | --- | --- | --- | --- | --- |
|  | **Psilocy.** | **MDMA** | **Cannabis** |  | **Psilocy. vs. MDMA** | **Psilocy. vs. Cannabis** | **MDMA vs. Cannabis** |
| **Clear intentions** | 2.86 (0.78) | 2.97 (0.78) | 2.63 (0.90) |  | -.11 (.63) | .29 (.05) | .40 (.004)** |
| **State of Surrender** | 2.70 (0.76) | 2.78 (0.71) | 2.46 (0.89) |  | -.09 (.72) | .29 (.048)*** | .39 (.005)** |
| **Spiritual Motivations** | 3.55 (1.53) | 3.62 (1.52) | 2.76 (1.64) |  | -.04 (.95) | .52 (< .001)* | .55 (< .001)*** |
| **Spoken Language** | 50.08 (24.39) | 57.83 (19.41) | 52.64 (23.15) |  | -.35 (.01)* | -.11 (.62) | .23 (.15) |
| *N* = 397. Cohen’s d and p-values are from follow-up pairwise contrasts. Psilcy. = psilocybin. MDMA = 3,4-Methylenedioxymethamphetamine. **p* < .05; ***p* < .01; ****p* < .001. | | | | | | | |

**Appendix C: Context of the Substance Use Experience by Condition**

Chi-square tests revealed significant differences in setting by substance (home: χ² = 26.54, *p* < .001, Cramer V = .26; other’s home: χ ² = 6.61, *p* = .04, V = .13; festival/party/concert: χ ² = 43.33, *p* < .001, V = .33). Participants using cannabis and psilocybin were more likely to use at home compared to MDMA (χ²s = 24.26 and 11.24, *p*s < .001), with no difference between psilocybin and cannabis (χ² = 2.29, *p* = .13). MDMA use was more likely than cannabis to occur at another’s home (χ² = 5.88, p = .02), but there were no significant differences between psilocybin and cannabis (χ² = 1.21, p = .27) or between psilocybin and MDMA (χ² = 1.45, *p* = .23). Festival/party/concert settings were more common for MDMA users than psilocybin (χ² = 20.15, *p* < .001) or cannabis (χ² = 36.41, *p* < .001), with no difference between psilocybin and cannabis (χ² = 2.40, *p* = .12).

| **Variable** | **Full Sample,**  **N (%)** |  | **Psilocybin,**  **N (%)** |  | **MDMA,**  **N (%)** |  | **Cannabis,**  **N (%)** |
| --- | --- | --- | --- | --- | --- | --- | --- |
| *Location/Setting for Use (could check multiple options)1* | | | | | | | |
| Home | 194 (49%) |  | 70 (53%) |  | 42 (32%) |  | 82 (63%) |
| Someone else’s home | 106 (27%) |  | 35 (26%) |  | 45 (34%) |  | 26 (20%) |
| Party | 94 (24%) |  | 24 (18%) |  | 50 (38%) |  | 20 (15%) |
| Concert or festival | 54 (14%) |  | 15 (11%) |  | 31 (23%) |  | 8 (6%) |
| Outdoors in nature | 42 (11%) |  | 24 (18%) |  | 11 (8%) |  | 7 (5%) |
| Public place (e.g., shopping mall, movie theater, etc.) | 18 (5%) |  | 3 (2%) |  | 8 (6%) |  | 7 (5%) |
| Other | 7 (2%) |  | 4 (3%) |  | 2 (2%) |  | 1 (1%) |
| *Concurrent Substance Use* | | | | | | | |
| No other substances | 98 (25%) |  | 35 (26%) |  | 16 (12%) |  | 47 (36%) |
| 1 other substance | 176 (44%) |  | 55 (41%) |  | 62 (47%) |  | 59 (45%) |
| 2 other substances | 76 (19%) |  | 28 (21%) |  | 31 (23%) |  | 17 (13%) |
| 3 other substances | 31 (8%) |  | 9 (7%) |  | 14 (11%) |  | 8 (6%) |
| 4 other substances | 10 (3%) |  | 6 (5%) |  | 4 (3%) |  | 0 (0%) |
| 5+ other substances | 5 (1%) |  | 0 (0%) |  | 5 (4%) |  | 0 (0%) |
| Prefer not to say | 1 (0%) |  | 0 (0%) |  | 1 (1%) |  | 0 (0%) |
| *How many people were you around during this experience?* |  |  |  |  |  |  |  |
| Alone | 72 (18%) |  | 24 (18%) |  | 18 (14%) |  | 30 (23%) |
| One other person | 105 (26%) |  | 40 (30%) |  | 19 (14%) |  | 46 (35%) |
| Small group (about 2-5 people) | 136 (34%) |  | 43 (32%) |  | 53 (40%) |  | 40 (31%) |
| Moderate size (6-20 people) | 58 (15%) |  | 19 (14%) |  | 27 (20%) |  | 12 (9%) |
| Large group (20 or more people) | 26 (7%) |  | 7 (5%) |  | 16 (12%) |  | 3 (2%) |
| *Primary Purpose for Use2* |  |  |  |  |  |  |  |
| Have fun, for enjoyment, or to celebrate | 281 (71%) |  | 85 (64%) |  | 100 (75%) |  | 96 (73%) |
| Treat a mental or physical health condition | 25 (6%) |  | 7 (5%) |  | 5 (4%) |  | 13 (10%) |
| Improve or change myself (self-optimization or self-change) | 24 (6%) |  | 16 (12%) |  | 2 (2%) |  | 6 (5%) |
| Spiritual reasons | 6 (2%) |  | 3 (2%) |  | 0 (0%) |  | 3 (2%) |
| Curiosity | 25 (6%) |  | 10 (8%) |  | 9 (7%) |  | 6 (5%) |
| Deepen a connection with others, earth, or nature | 11 (3%) |  | 6 (5%) |  | 4 (3%) |  | 1 (1%) |
| Distract myself/escape from my problems | 18 (5%) |  | 4 (3%) |  | 10 (8%) |  | 4 (3%) |
| Enhance sex | 4 (1%) |  | 2 (2%) |  | 2 (2%) |  | 0 (0%) |
| Other | 3 (1%) |  | 0 (0%) |  | 1 (1%) |  | 2 (2%) |
| *Healing/Growth Oriented Primary Purpose3* | 66 (17%) |  | 32 (24%) |  | 11 (8%) |  | 23 (18%) |
|  |  |  |  |  |  |  |  |
| *Note: N* = 133 for the psilocybin and MDMA conditions and 131 for the cannabis condition. MDMA = 3,4-Methylenedioxymethamphetamine. 1A response option was: “Religious or Spiritual Setting (e.g., ceremony, retreat, etc.)” but this was not endorsed in our sample and is thus not included in the table. 2Participate in a ceremonial event was a response option but was not endorsed in our sample and is thus not included in the table. 3Binary variable coded as ‘yes’ if reason endorsed was ‘treat a mental or physical health condition’, ‘improve or change myself’, ‘spiritual reasons’ or ‘to deepen a connection with others, earth or nature’ | | | | | | | |

**Appendix D:** Table of Descriptive Statistics for Outcomes by Substance

| **Variable** | **Psilocybin,**  **M (SD)** | **MDMA,**  **M (SD)** | **Cannabis,**  **M (SD)** |
| --- | --- | --- | --- |
| Intensity of Experience | 2.64 (0.71) | 2.63 (0.78) | 2.84 (0.78) |
| Self-Transcendent Experiences |  |  |  |
| Self-Loss | 10.91 (5.71) | 10.38 (5.27) | 9.17 (6.11) |
| Connection | 12.71 (5.61) | 12.93 (5.25) | 9.33 (6.41) |
| Mystical Experiences Questionnaire (MEQ) - Total | 60.30 (21.98) | 62.28 (18.77) | 47.18 (24.71) |
| MEQ – Transcendence | 60.70 (23.08) | 62.21 (20.40) | 52.21 (25.73) |
| MEQ – Ineffability | 66.72 (25.22) | 66.67 (22.62) | 55.17 (25.74) |
| MEQ – Positive Emotions | 65.26 (20.90) | 71.85 (18.33) | 54.55 (22.96) |
| MEQ – Mystical Experiences | 56.87 (25.19) | 57.59 (23.12) | 40.61 (28.89) |
| Positive Self-Transcendent Emotions1 | 15.00 (4.92) | 15.00 (4.32) | 12.00 (5.88) |
| Overall Positive Emotions | 15.59 (4.78) | 16.92 (3.94) | 13.64 (4.90) |
| Overall Negative Emotions1 | 8.00 (3.80) | 7.00 (4.18) | 8.00 (4.47) |
| Persisting Positive Effects1 | 62.50 (21.05) | 58.33 (19.28) | 50.00 (22.37) |
| *Note: N* = 133 for the psilocybin and MDMA and 131 for the cannabis. MEQ = mystical experiences questionnaire. MDMA = 3,4-Methylenedioxymethamphetamine*.*1Median presented given high skew/kurtosis. | | | |

**Appendix E.** Table Presenting Linear Regression Results of the Relationship Between Condition and Facets of Mystical Experiences, as assessed by the Mystical Experiences Questionnaire (MEQ)

|  |  |  |  |  |  | **Confidence Interval** | |  |
| --- | --- | --- | --- | --- | --- | --- | --- | --- |
|  |  | **Estimate** | **Beta (β)** | **SE** | **t value** | **Lower** | **Upper** | **p** |
| Model with MEQ Self-Transcendence | Step 1 – No Covariates | | | | | | | |
| MDMA | 9.99 | 0.20 | 2.88 | 3.47 | 4.39 | 15.60 | < .001 |
| Psilocybin | 8.49 | 0.17 | 3.02 | 2.81 | 2.88 | 14.09 | .005 |
| Step 2 – With Covariates | | | | | | | |
| MDMA | 2.51 | 0.05 | 2.31 | 1.09 | -2.14 | 7.16 | .28 |
| Psilocybin | 2.51 | 0.05 | 2.38 | 1.05 | -2.10 | 7.119 | .29 |
| Clear Intention | -1.64 | -0.06 | 1.31 | -1.25 | -4.02 | 0.740 | .21 |
| Spiritual Motives | 4.16 | 0.29 | 0.83 | 4.99 | 2.76 | 5.56 | < .001 |
| State of Surrender | 12.38 | 0.42 | 1.48 | 8.34 | 9.62 | 15.13 | < .001 |
| Spoken language | 0.05 | 0.05 | 0.05 | 1.15 | -0.03 | 0.14 | .25 |
| Model with MEQ Ineffability | Step 1 – No Covariates | | | | | | | |
| MDMA | 11.50 | 0.22 | 3.01 | 3.83 | 5.56 | 17.44 | < .001 |
| Psilocybin | 11.55 | 0.22 | 3.18 | 3.63 | 5.61 | 17.49 | < .001 |
| Step 2 – With Covariates | | | | | | | |
| MDMA | 3.94 | 0.07 | 2.46 | 1.60 | -1.18 | 9.05 | .11 |
| Psilocybin | 5.64 | 0.11 | 2.73 | 2.07 | 0.57 | 10.71 | .04 |
| Clear Intention | 0.45 | 0.02 | 1.41 | 0.32 | -2.17 | 3.07 | .75 |
| Spiritual Motives | 3.33 | 0.21 | 0.84 | 3.97 | 1.79 | 4.87 | < .001 |
| State of Surrender | 12.78 | 0.41 | 1.50 | 8.54 | 9.74 | 15.81 | < .001 |
| Spoken language | 0.05 | 0.05 | 0.05 | 1.06 | -0.04 | 0.14 | .29 |
| Model with MEQ Positive Emotions | Step 1 – No Covariates | | | | | | | |
| MDMA | 17.30 | 0.37 | 2.57 | 6.72 | 12.26 | 22.34 | < .001 |
| Psilocybin | 10.71 | 0.23 | 2.70 | 3.97 | 5.67 | 15.74 | < .001 |
| Step 2 – With Covariates | | | | | | | |
| MDMA | 10.35 | 0.22 | 2.12 | 4.89 | 6.22 | 14.471 | < .001 |
| Psilocybin | 5.78 | 0.12 | 2.10 | 2.76 | 1.69 | 9.87 | .01 |
| Clear Intention | 0.51 | 0.02 | 1.09 | 0.46 | -1.61 | 2.62 | .64 |
| Spiritual Motives | 2.28 | 0.17 | 0.69 | 3.29 | 1.04 | 3.52 | .001 |
| State of Surrender | 12.77 | 0.47 | 1.33 | 9.57 | 10.32 | 15.22 | < .001 |
| Spoken language | 0.11 | 0.11 | 0.04 | 2.64 | 0.04 | 0.18 | .01 |
| Model with MEQ Mystical Experiences | Step 1 – No Covariates | | | | | | | |
| MDMA | 16.98 | 0.30 | 3.38 | 5.02 | 10.73 | 23.23 | < .001 |
| Psilocybin | 16.26 | 0.29 | 3.32 | 4.90 | 10.01 | 22.51 | < .001 |
| Step 2 -- With Covariates | | | | | | | |
| MDMA | 5.67 | 0.10 | 2.26 | 2.51 | 1.31 | 10.03 | .01 |
| Psilocybin | 7.12 | 0.13 | 2.19 | 3.26 | 2.81 | 11.44 | .001 |
| Clear Intention | 0.11 | 0.004 | 1.22 | 0.09 | -2.12 | 2.34 | .93 |
| Spiritual Motives | 7.77 | 0.46 | 0.78 | 9.95 | 6.46 | 9.08 | < .001 |
| State of Surrender | 12.06 | 0.36 | 1.37 | 8.79 | 9.48 | 14.65 | < .001 |
| Spoken language | 0.09 | 0.07 | 0.04 | 2.06 | 0.01 | 0.16 | .04 |
| *Note. N* = 397. MDMA = 3,4-Methylenedioxymethamphetamine | | | | | | | | |

| **Appendix F:** Table of Results from Models Examining the Relationship between Overall Positive Emotions and Overall Negative Emotions | | | | | | | | |
| --- | --- | --- | --- | --- | --- | --- | --- | --- |
|  |  |  |  |  |  | **Confidence Interval** | |  |
|  |  | **Estimate** | **Beta (β)** | **SE** | **test value** | **Lower** | **Upper** | **p** |
| Model 1: Overall Positive Emotions | Step 1 – No Covariates | | | | | | | |
| MDMA | 3.28 | 0.33 | 0.55 | 5.94 | 2.18 | 4.38 | < .001 |
| Psilocybin | 1.95 | 0.19 | 0.60 | 3.23 | 0.85 | 3.05 | .001 |
| Step 2 – With Covariates | | | | | | | |
| MDMA | 1.96 | 0.20 | 0.51 | 3.84 | 2.97 | 3.01 | < .001 |
| Psilocybin | 0.92 | 0.09 | 0.53 | 1.75 | 1.93 | 1.96 | .08 |
| Clear Intention | 0.37 | 0.07 | 0.27 | 1.36 | 0.89 | 0.92 | .17 |
| Spiritual Motives | 0.81 | 0.27 | 0.17 | 4.76 | 1.11 | 1.12 | < .001 |
| State of Surrender | 1.27 | 0.21 | 0.33 | 3.83 | 1.87 | 1.80 | < .001 |
| Spoken language | 0.01 | 0.06 | 0.01 | 1.51 | 0.03 | 0.03 | .13 |
| Model 2: Overall Negative Emotions | Step 1 – No Covariates | | | | | | | |
| MDMA | -0.05 | -0.05 | 0.06 | -0.92 | -0.17 | 0.06 | .36 |
| Psilocybin | -0.08 | -0.08 | 0.06 | -1.42 | -0.19 | 0.03 | .16 |
| Step 2 – With Covariates | | | | | | | |
| MDMA | -0.07 | -0.07 | 0.06 | -1.20 | -0.18 | 0.04 | .23 |
| Psilocybin | -0.11 | -0.11 | 0.06 | -1.99 | -0.23 | 0.00 | .05 |
| Clear Intention | -0.01 | -0.004 | 0.03 | -0.18 | -0.06 | 0.05 | .86 |
| Spiritual Motives | 0.08 | 0.16 | 0.02 | 4.40 | 0.04 | 0.11 | < .001 |
| State of Surrender | -0.13 | -0.09 | 0.04 | -3.52 | -0.19 | -0.06 | < .001 |
| Spoken language | 0.00 | -0.05 | 0.00 | -2.36 | 0.00 | 0.00 | .02 |
| *Note. N* = 397. Model 1 was a hierarchical linear regression. Model 2 is a generalized linear model with a compound poisson-gamma distribution with a log-link function. | | | | | | | | |
